# Supplementary material for: Help-Seeking Behaviors Among Older Adults: A Scoping Review
Source: PubMed Central journal article supplement (PMC9024019; doi:10.1177/07334648211067710), 2022-02-13
Supplement: sj-pdf-1-jag-10.1177_07334648211067710.pdf [file sj-pdf-1-jag-10.1177_07334648211067710.pdf]

**Supplemental Table 1. Help-Seeking Characteristics & Factors among Older Adults**

| <b>Author(s)</b>       | <b>Type of help-seeking behavior(s)</b>                                                                   | <b>Health challenge(s)</b>                                                 | <b>Help-seeking Barriers</b>                                                                                                                                                                                                                 | <b>Help-seeking Facilitators</b>                                                                                                                                                                                                |
|------------------------|-----------------------------------------------------------------------------------------------------------|----------------------------------------------------------------------------|----------------------------------------------------------------------------------------------------------------------------------------------------------------------------------------------------------------------------------------------|---------------------------------------------------------------------------------------------------------------------------------------------------------------------------------------------------------------------------------|
| Altizer et al. 2014    | Health information seeking (e.g. from friends, healthcare providers & media sources)                      | General health challenges                                                  | -                                                                                                                                                                                                                                            | Being confronted with unfamiliar/novel symptoms or when a known treatment was not effective                                                                                                                                     |
| Aubut et al. 2021      | Asking for help from an addiction service centre                                                          | Substance use                                                              | Lack of knowledge about services and availability of services                                                                                                                                                                                | Deteriorating health, desire to fill grandparent role, involvement of social supports, having a family doctor, available resources (e.g. addiction services)                                                                    |
| Begum et al. 2013      | Seeking help from a local specialist memory assessment service                                            | Memory complaints                                                          | Viewing issues as not concerning, having causal beliefs that led to beliefs in lack of control, negative perceptions of general practitioners, stigma, pride, preference to cope alone or to use self-help strategies                        | Positive views of health system, having alternative pathways to care (e.g. medical surveillance through regular visits with general practitioner), available social supports, presence of comorbidities                         |
| Bonnewyn et al. 2009   | Seeking mental health services, antidepressants, and benzodiazepines                                      | Depression and chronic pain                                                | -                                                                                                                                                                                                                                            | Presence of major depressive episode or painful physical symptoms                                                                                                                                                               |
| Canvin et al. 2018     | Various (e.g. medical and family-provided support, both paid or unpaid)                                   | General health challenges                                                  | No perception of need, viewing decline as an inevitable consequence of age, viewing assistance as a threat to independence and inability to cope, not wanting to be a burden, passivity, lack of awareness                                   | Reaching a point where deterioration could not be denied, impact of decline on usual activities and independence                                                                                                                |
| Chen 2020              | Medical treatment-seeking                                                                                 | Chronic conditions (e.g. diabetes, hypertension, arthritis, heart disease) | Low literacy, low awareness of illness and severity, cost, not wanting to be a bother to family, poor family living conditions, resignation to fate/folk remedies, poor doctor-patient communication                                         | Availability of others for help and advice (e.g. family, neighbours, volunteers), having treatments close to home, increased seriousness of disease                                                                             |
| Chung et al. 2018      | Various (e.g. Health information seeking, complementary/alternative therapies, regular clinic visits)     | Various (e.g. Chronic conditions, memory issues, mobility limitations)     | Seeing oneself as healthy, mistrust, adapting to aging body, shorter immigration period, language barriers, lack of support and available information, cost, limited health insurance                                                        | Longer length of residency, community resources and organizations, social engagement, physicians motivating concerns about future falls and frailty, home care workers serving as source of health information, health coverage |
| Clarke et al. 2014     | Seeking help from health professionals                                                                    | Musculoskeletal chronic pain                                               | Not wanting to bother or waste physician's time, the need to be really ill first, not wanting to be viewed as a 'complainer' or a 'fraud', issues associated with age, not getting a diagnosis for pain, assuming providers's dismissiveness | When pain becomes persistent/noticeable/repetitive, feeling listened to and heard                                                                                                                                               |
| Djukanović et al. 2015 | Seeking formal care (from a physician, district nurse, welfare officer, psychologist and physiotherapist) | Depression                                                                 | Negative experiences from previous provider visits, difficulty getting through on the phone, symptoms got better on its own, cost, lack of awareness, time (e.g. had no time or waiting time too long)                                       | -                                                                                                                                                                                                                               |

**Supplemental Table 1. Help-Seeking Characteristics & Factors among Older Adults**

| Author(s)                  | Type of help-seeking behavior(s)                                                                                             | Health challenge(s)                                              | Help-seeking Barriers                                                                                                                                                                                                                                                                                                                                                                        | Help-seeking Facilitators                                                                                                                                               |
|----------------------------|------------------------------------------------------------------------------------------------------------------------------|------------------------------------------------------------------|----------------------------------------------------------------------------------------------------------------------------------------------------------------------------------------------------------------------------------------------------------------------------------------------------------------------------------------------------------------------------------------------|-------------------------------------------------------------------------------------------------------------------------------------------------------------------------|
| Dollard et al. 2014        | Seeking help from a general practitioner                                                                                     | Falls                                                            | Perceiving fall or fall-related injury as not serious, beliefs that general practitioner could not help, not wanting to "make a fuss", attribution of falls to extrinsic factors (e.g. uneven footpath, hurrying), discounting intrinsic risk factors (e.g. leg weakness, poor balance), not wanting to waste practitioners' time, untimely access to practitioner                           | Perceiving fall-related injury as serious (e.g. visible injuries or pain impairing mobility), persuasion/negotiation/coercion by others                                 |
| Elias and Lowton 2014      | Seeking medical care (e.g. from a general practitioner, at a hospital)                                                       | Various (e.g. severe pain, coughs)                               | Belief that doctors could not help, attributing problems to old age, desire not to burden others, valuing functional independence, negative accounts of receiving help when they did not seek it or being sent home despite seeking help at the hospital                                                                                                                                     | Greatly impaired function, believing they were more vulnerable due to age, perceiving that physical access to the doctor was more difficult, being obliged by relatives |
| Eriksson-Backa et al. 2018 | Health information seeking                                                                                                   | General health challenges                                        | -                                                                                                                                                                                                                                                                                                                                                                                            | Higher health information literacy, being female, higher education level                                                                                                |
| Frost et al. 2020          | Various (e.g. from general practitioners, social workers, mental health professionals, adult children, support groups)       | Frailty, depression and anxiety                                  | Low expectations, normalizing decline and the aging experience, not experiencing improvement after seeking treatment, family conflict, finances, lack of awareness of available supports, threats to independence, fear of dependency on antidepressants, experiencing difficulties with telephone appointments or technology, being unable to access appointments, difficulty leaving homes | Moderate-to-severe symptoms, endorsement of treatments by others, face-to-face contact, delivery of services provided at home, locally or with transport provided       |
| Garg et al. 2017           | Seeing a doctor or other medical person                                                                                      | Various (e.g. chronic conditions, multimorbidity)                | Low perceived severity of illness, costs, belief that doctors could not help, schedule or personal conflicts, trouble finding or getting to a doctor, high worry and fear of knowing the illness, and non-acceptance of insurance by the doctor                                                                                                                                              | Higher age, non-smoking status, higher income, having a usual source of care, lower worry about personal health                                                         |
| Garrido et al. 2011        | Seeking mental health care (e.g. from a physician, nurse, occupational therapist, psychiatrist, psychologist, social worker) | Various (e.g. mental illness, alcohol abuse, chronic conditions) | Problems went away by itself, desire to handle issues on their own, cost, low perceived seriousness, thinking treatment would not be useful, not knowing where to go for care, scheduling difficulties, limited insurance coverage, stigma                                                                                                                                                   | Perceiving a need for care, having a history of more chronic physical conditions, history of alcohol abuse or dependence, having private insurance                      |
| Gore-Gorszewska 2020       | Seeking medical or psychological help                                                                                        | Sexual problems                                                  | Not recognizing symptoms or treating symptoms as part of aging, fear of doctors' disapproval or having problems dismissed, stigma, sexual problems considered less important than other medical conditions, lack of knowledge and awareness on how to access appropriate services                                                                                                            | -                                                                                                                                                                       |

**Supplemental Table 1. Help-Seeking Characteristics & Factors among Older Adults**

| Author(s)                 | Type of help-seeking behavior(s)                                                                                                | Health challenge(s)               | Help-seeking Barriers                                                                                                                                                                                                                                                                                                                      | Help-seeking Facilitators                                                                                                                                                                                                                                                                                                  |
|---------------------------|---------------------------------------------------------------------------------------------------------------------------------|-----------------------------------|--------------------------------------------------------------------------------------------------------------------------------------------------------------------------------------------------------------------------------------------------------------------------------------------------------------------------------------------|----------------------------------------------------------------------------------------------------------------------------------------------------------------------------------------------------------------------------------------------------------------------------------------------------------------------------|
| Gur-Yaish et al. 2016     | Using psychotherapy                                                                                                             | Depressive symptoms               | -                                                                                                                                                                                                                                                                                                                                          | Perceived need, positive attitudes toward psychotherapy use, accessibility to services, recommendations from primary physicians                                                                                                                                                                                            |
| Hannaford et al. 2019     | Seeking psychological services                                                                                                  | Mental health challenges          | Reluctance to disclose mental health concerns, short consultation times, passivity, a focus on physical symptoms, lack of enquiry by the GP, low mental health literacy, lack of familiarity with psychotherapy, feeling that challenges should be dealt with individually, stigma                                                         | Experiencing trust and the absence of judgement, practitioner's providing advice/referral/initiating discussion of mental health problems, favorable help-seeking experiences in the past, access to social and professional networks linked with religious communities                                                    |
| Hartvigsen et al. 2006    | Seeking medical care (e.g. from a general medical practitioner, medical specialist, hospital, chiropractor, physical therapist) | Neck and back pain                | -                                                                                                                                                                                                                                                                                                                                          | Higher duration and intensity of pain                                                                                                                                                                                                                                                                                      |
| Hohls et al. 2021         | Receiving informal and/or formal support (e.g. from friends, relatives, or local services)                                      | Psychological distress            | -                                                                                                                                                                                                                                                                                                                                          | Experiencing psychological distress or increased anxiety symptoms                                                                                                                                                                                                                                                          |
| Hornig et al. 2014        | Seeking medical attention                                                                                                       | Fecal incontinence                | -                                                                                                                                                                                                                                                                                                                                          | Living in urban areas, mucous stool incontinence, frequent symptoms impacting social life/work life, anxiety, family interactions                                                                                                                                                                                          |
| Horton and Dickinson 2011 | Various (e.g. using formal health services, telling adult children)                                                             | Falls                             | Embarrassment, wanting to speak on positive events with friends, not wanting to worry adult children, belief in metaphysical explanations such as fatalism/luck/lay beliefs, attribution of illness with age, self-judgement, lack of information/knowledge about services, language & literacy barriers                                   | Subsidized interventions, information presented via visual media (e.g. via television/DVD in Chinese, word of mouth), culturally appropriate interventions                                                                                                                                                                 |
| Hurst et al. 2013         | Health information-seeking (e.g. from newspapers, doctors, nurses, pharmacists, family, friends, internet)                      | General health challenges         | Values and beliefs related to family history and superstition, perceiving the event as insignificant, viewing their condition as part of a normal aging process, fear, not wanting to bother the doctor                                                                                                                                    | Change in health, the need for information around an actual or suspected diagnosis (self-assessment of symptoms usually done first), reading articles in the newspaper and having conversations with family/friends/health professionals, viewing event as serious, rising health concerns, past experiences and knowledge |
| Hwang and Jeong 2012      | Going to the hospital                                                                                                           | Acute myocardial infarction (AMI) | Lower education, non-ST-elevation MI, presence of preinfarction angina pain, attribution of symptoms to a non-cardiac origin, perceiving no heart attack threat, lack of knowledge/recognition of urgency of symptoms and risk, optimistic self-appraisal of symptoms, overconfidence about health, not wanting to bother or burden others | -                                                                                                                                                                                                                                                                                                                          |

**Supplemental Table 1. Help-Seeking Characteristics & Factors among Older Adults**

| Author(s)             | Type of help-seeking behavior(s)                                                              | Health challenge(s)                                            | Help-seeking Barriers                                                                                                                                                                                                                                                                                                                                                                                           | Help-seeking Facilitators                                                                                                                                                                                                                                                                                                                                                                                                                                 |
|-----------------------|-----------------------------------------------------------------------------------------------|----------------------------------------------------------------|-----------------------------------------------------------------------------------------------------------------------------------------------------------------------------------------------------------------------------------------------------------------------------------------------------------------------------------------------------------------------------------------------------------------|-----------------------------------------------------------------------------------------------------------------------------------------------------------------------------------------------------------------------------------------------------------------------------------------------------------------------------------------------------------------------------------------------------------------------------------------------------------|
| Johnston et al. 2010  | Using a personal alarm to receive assistance                                                  | Falls                                                          | Performance of alarms not well understood, alarms viewed as obtrusive/uncomfortable/unnecessary, expressions of fatalism/resignation/denial of fall risk, cost, negative feelings of being a burden, threats to independence and identity, fear of going to the hospital and not being able to return home                                                                                                      | Perceived benefits of personal alarms (e.g. personal safety, improved independence and reassurance), alarm use motivated by previously bad experiences (e.g. previous injury), positive experience of receiving quick medical attention after using the alarm, influence of family/health professionals                                                                                                                                                   |
| Kagan et al. 2018     | Seeking help from a social worker                                                             | General health challenges                                      | Stigma, higher education, lower self-rated health                                                                                                                                                                                                                                                                                                                                                               | Self-reported loneliness, better self-rated health, positive attitudes towards social workers, prior experience with receiving professional help                                                                                                                                                                                                                                                                                                          |
| Kelly et al. 2011     | Consulting hearing services                                                                   | Hearing impairments                                            | Not experiencing communication breakdowns or experiencing them in predictable ways (resulting in low cognitive anxiety and lack of consulting)                                                                                                                                                                                                                                                                  | Being unable to make useful predictions about communication events, provision of hearing aids that reduced the number of communication breakdowns, knowing about communication strategies                                                                                                                                                                                                                                                                 |
| Kharicha et al. 2013  | Seeking medical care (e.g. from general practitioner, optician)                               | Vision loss                                                    | Denial, fear, viewing worsening vision as normal or a part of aging, costs of buying and updating lenses/glasses, mistrust in the commercial motivation of the optical industry                                                                                                                                                                                                                                 | Seeking help depended on significant events and changes (e.g. experiencing difficulty in watching television/driving/reading bus numbers)                                                                                                                                                                                                                                                                                                                 |
| Krishnan and Lim 2012 | Using subsidized healthcare facilities (e.g. government polyclinics and hospitals)            | General health challenges                                      | Low confidence in subsidized medical care providers, language discordance, difficulties communicating with doctors led participants to be more likely to be dissatisfied with the quality of healthcare received                                                                                                                                                                                                | Service awareness, financial resources, affordable services                                                                                                                                                                                                                                                                                                                                                                                               |
| Lau et al. 2014       | Seeking help from healthcare professionals                                                    | Various (e.g. hypertension, diabetes, arthritis, osteoporosis) | Being married, valuing the idea of keeping personal matters within the family, low self-esteem, impaired body image, fear of intimacy with helping professionals                                                                                                                                                                                                                                                | -                                                                                                                                                                                                                                                                                                                                                                                                                                                         |
| Lawrence et al. 2006  | Various (e.g. seeking help from family or general practitioner, religion and self-management) | Depression                                                     | Not wanting to rely on family, past experiences of general practitioners not helping, belief that doctors were too busy/overly reliant on medication, limited consultation time, doctors dismissing their complaints, fear of medications creating dependency, concerns about side effects, confusion about the exact role of counsellors, belief one should not share personal problems with strangers, stigma | Being able to share without fear of boring others/becoming a burden/being judged, families providing advice or seeking help on their behalf, seeking friends as source of encouragement/advice/reassurance, access to day centres, not feeling well, belief that doctors could and should help, opportunity to speak to a professional who was distanced from the situation, regular contact with psychiatrists and subsequent experiences of reassurance |
| Lee et al. 2005       | Various (e.g. consulting friends, spouses or health professionals)                            | Benign prostatic hyperplasia (BPH) and BPH-related symptoms    | Attributing symptoms as part of a natural aging process and thus untreatable, feeling embarrassed or fearful of cancer                                                                                                                                                                                                                                                                                          | -                                                                                                                                                                                                                                                                                                                                                                                                                                                         |

**Supplemental Table 1. Help-Seeking Characteristics & Factors among Older Adults**

| Author(s)                   | Type of help-seeking behavior(s)                                               | Health challenge(s)               | Help-seeking Barriers                                                                                                                                                                                                                                                                                                                                                                                      | Help-seeking Facilitators                                                                                                                              |
|-----------------------------|--------------------------------------------------------------------------------|-----------------------------------|------------------------------------------------------------------------------------------------------------------------------------------------------------------------------------------------------------------------------------------------------------------------------------------------------------------------------------------------------------------------------------------------------------|--------------------------------------------------------------------------------------------------------------------------------------------------------|
| Lee et al. 2012             | Seeing a doctor                                                                | Disabilities                      | Minority status, marital status, lower education, living in Midwest regions/rural areas, older adults with disabilities had significantly higher odds of delaying seeing a doctor due to cost                                                                                                                                                                                                              | -                                                                                                                                                      |
| Lee et al. 2020             | Accessing healthcare services and financial assistance schemes                 | Chronic conditions                | Low awareness/understanding of services/subsidy schemes/benefits, long wait times, perceived high costs of care, choosing to take personal responsibility over their own health, fear of being a burden, fear of receiving bad news, desire for independence, needs did not always match the services provided, perceived lack of medical expertise by community healthcare providers, low health literacy | Convenience and proximity, perceiving condition to be more serious                                                                                     |
| Makam et al. 2016           | Going to the hospital                                                          | Acute myocardial infarction (AMI) | Onset of acute symptoms between 6 PM and 5:59 AM, presence of previously diagnosed multiple comorbidities, hospital presentation with atypical symptoms of AMI, diagnosis of an NSTEMI (non-ST-segment elevation myocardial infarction)                                                                                                                                                                    | -                                                                                                                                                      |
| Makris et al. 2015          | Seeking formal healthcare (e.g. talking to providers, having surgery)          | Restricting back pain             | Mistrust, negative relationships with providers, placing priority on other comorbidities, beliefs about the inevitability of restricting back pain, providers dismissing/minimizing participants' pain, ageist experiences, negative attitudes toward medication/surgery                                                                                                                                   | Positive relationships with providers                                                                                                                  |
| McCabe et al. 2017          | Seeking medical attention                                                      | Atrial fibrillation (AF)          | Inaccurate beliefs/misperceptions about AF, lack of knowledge about AF/symptoms, lack of confidence, unsure of when to seek treatment                                                                                                                                                                                                                                                                      | Recognition that certain symptoms (e.g. shortness of breath, skipping heartbeats) should be evaluated, availability of family members                  |
| McGowan and Midlarsky 2012  | Using psychotherapy/counselling                                                | Mental health challenges          | Limited openness to mental health interventions, viewing psychotherapists as outsiders, treatment seen as a threat to beliefs, lower stigma tolerance, fear                                                                                                                                                                                                                                                | Perceived need, interpersonal openness, confidence in mental health practitioners                                                                      |
| Mechakra-Tahiri et al. 2011 | Seeking consultation from a health professional                                | Depression                        | Stigma, lack of accessibility, living in rural areas                                                                                                                                                                                                                                                                                                                                                       | Perceiving themselves as in poor health, presence of a confidant and emotional/instrumental support<br>*noted differences between men & women          |
| Miller et al. 2016          | Receiving informal support from spouses, family members, friends and neighbors | Falls                             | Wanting to remain independent and self-sufficient, pride, not wanting to owe someone in the future/becoming a burden, feeling devalued                                                                                                                                                                                                                                                                     | Setting a routine/preset schedule where friends/family were available on specific days each week, mutual dependence/acceptance of help between friends |
| Mukherjee 2019              | Various (e.g. using healthcare services, alternative medical amenities)        | General health challenges         | Language barriers, lack of accessible information, financial constraints, seeing age and illness as inseparable phenomena, viewing illness as a result of sins, no supports available, not wanting to move out of their home for treatment, cultural beliefs, stigma                                                                                                                                       | Residential proximity of providers, only going to doctors when participants' situation deteriorated                                                    |

**Supplemental Table 1. Help-Seeking Characteristics & Factors among Older Adults**

| Author(s)              | Type of help-seeking behavior(s)                                                                                                               | Health challenge(s)                                                                | Help-seeking Barriers                                                                                                                                                                                                                                                                                                                                                                                                                          | Help-seeking Facilitators                                                                                                                                                                                                                                                      |
|------------------------|------------------------------------------------------------------------------------------------------------------------------------------------|------------------------------------------------------------------------------------|------------------------------------------------------------------------------------------------------------------------------------------------------------------------------------------------------------------------------------------------------------------------------------------------------------------------------------------------------------------------------------------------------------------------------------------------|--------------------------------------------------------------------------------------------------------------------------------------------------------------------------------------------------------------------------------------------------------------------------------|
| Murata et al. 2010     | Seeking medical and dental care                                                                                                                | Various (e.g. hypertension, visual impairment, arthritis, heart disease, diabetes) | Costs/lower socioeconomic status, distance, lack of transportation, being too busy, conditions not serious enough, living in rural areas                                                                                                                                                                                                                                                                                                       | -                                                                                                                                                                                                                                                                              |
| Pickard and Guo 2008   | Seeking help from a clergy                                                                                                                     | Mental health challenges                                                           | -                                                                                                                                                                                                                                                                                                                                                                                                                                              | Those with less social support/higher-reported levels of stress/reported more frequent religious attendance/engaged in more private religious activities/higher intrinsic religiosity scores more likely to have sought help from clergy                                       |
| Pickard and Tang 2009  | Help-seeking from a clergy compared to other formal sources (e.g. from psychiatrists, self-help groups, or other mental health specialists)    | Mental health challenges                                                           | -                                                                                                                                                                                                                                                                                                                                                                                                                                              | Religiosity and stress associated with help-seeking from clergy and other formal sources                                                                                                                                                                                       |
| Polacsek et al. 2019   | Seeking formal support (e.g. from professional/private/public health providers, hospitals, community services)                                 | Depression                                                                         | Stigma, struggling to become self-motivated to seek help, associating aging with mental or physical decline, difficulty accessing formal supports(e.g. far geographical location/long waiting lists/financial cost), perceived low quality of formal support, low awareness of mental health nurses' role and no understanding of how to access them, experiencing ageism, difficulty obtaining an initial diagnosis, lack of informal support | Accepting personal responsibility for help-seeking, improved mental health literacy, access to online information, establishing a therapeutic alliance with a trusted health professional, being actively involved in the decision-making process, optimizing informal support |
| Schaller et al. 2020   | Seeking formal clinical support (e.g. from general practitioners, specialists, or other healthcare personnel)                                  | Sexual problems                                                                    | Stigma, fear, unsatisfactory approaches by providers, lack of knowledge/competency to request help, sexuality seen as less relevant in relation to other more serious/complex health issues, lack of sexual knowledge as a consequence of cultural/historical factors, experiencing ageism, possible homophobic attitudes/discrimination, healthcare atmosphere not able to provide a caring climate to discuss sensitive/complex matters      | Providers initiating the subject of sexuality from a professional standpoint, desire to express personal agency, believing they had a personal duty to ask their doctor, healthcare provider's explicit knowledge and competence (e.g. having a gay doctor)                    |
| Schneider et al. 2014  | Various (e.g. seeing an audiologist, hearing aid provider, general practitioner, Ear, Nose and Throat specialist, attending a self-help group) | Dual sensory (vision and hearing) impairment                                       | Being able to hear well enough, having more serious priorities to deal with, negative past experiences with hearing aids/service providers, wanting to only deal with vision loss and not hearing, no time                                                                                                                                                                                                                                     | Being participants in the Vision-Hearing Project, hearing loss affecting day-to-day conversations/activities, encouragement from family/friends, hearing getting worse                                                                                                         |
| Stenzelius et al. 2006 | Seeking medical help                                                                                                                           | Urinary symptoms                                                                   | -                                                                                                                                                                                                                                                                                                                                                                                                                                              | Influence of issues on daily life, storage symptoms and pain symptoms                                                                                                                                                                                                          |
| Stenzelius et al. 2007 | Seeking medical help                                                                                                                           | Fecal incontinence                                                                 | -                                                                                                                                                                                                                                                                                                                                                                                                                                              | Discomfort and leakage problems                                                                                                                                                                                                                                                |

**Supplemental Table 1. Help-Seeking Characteristics & Factors among Older Adults**

| Author(s)              | Type of help-seeking behavior(s)                    | Health challenge(s)                                     | Help-seeking Barriers                                                                                                                                                                                                                                                             | Help-seeking Facilitators                                                                                                                                                                                                                                                                                                         |
|------------------------|-----------------------------------------------------|---------------------------------------------------------|-----------------------------------------------------------------------------------------------------------------------------------------------------------------------------------------------------------------------------------------------------------------------------------|-----------------------------------------------------------------------------------------------------------------------------------------------------------------------------------------------------------------------------------------------------------------------------------------------------------------------------------|
| Stoller et al. 2011    | Consulting a doctor                                 | Various (e.g. chronic conditions, acute symptoms)       | Regularly occurring symptoms                                                                                                                                                                                                                                                      | Perceiving a change in a symptom, experiencing uncertainty about the efficacy of management strategies, intolerable/intense pain, unknown cause of issues, new/unusual symptoms, persisting/recurring/worsening symptom, intending to use doctor as a gatekeeper (e.g. to receive prescription medications)                       |
| Tsai and Tsai 2007     | Various (e.g. seeking help from significant others) | General health challenges                               | Lack of awareness of resources, language barriers, self-perceived health status, having preventive coping strategies, being resigned to one's situation                                                                                                                           | Convenience of external environmental resources, more human resources, greater understanding of available resources                                                                                                                                                                                                               |
| Waterworth et al. 2018 | Contacting a primary nurse by telephone             | Multimorbidity (e.g. cardiovascular diseases, diabetes) | Cost, short consultation times, having to make sense of symptoms amidst comorbidities, uncertainty/not knowing who they would approach about concerns or how, attributing symptoms to aging, feeling like nurses could not help as they had been referred to a doctor in the past | Being able to access a nurse by telephone (particularly for those living in rural areas), having a clear understanding of the nurse's role, previous positive experiences of contacting the nurse, awareness that the nurse could be a positive link with the doctor if needed, trust and confidence, feeling heard by the nurses |
