# Supplementary material for: Help-Seeking Behaviors Among Older Adults: A Scoping Review
Source: PubMed Central journal article supplement (PMC9024019; doi:10.1177/07334648211067710), 2022-02-13
Supplement: sj-pdf-3-jag-10.1177_07334648211067710.pdf [file sj-pdf-3-jag-10.1177_07334648211067710.pdf]

## Supplementary File 2. Database Search Queries

### *MEDLINE/PubMed*

1. Search: ("help seek\*" OR "treatment seek\*" OR "health information seek\*" OR "healthcare seek\*" OR "care seek\*" OR "health seek\*") AND ("older adults" OR "older people" OR "elderly" OR "seniors" OR "geriatrics")

("help seek\*[All Fields] OR "treatment seek\*[All Fields] OR "health information seek\*[All Fields] OR "healthcare seek\*[All Fields] OR "care seek\*[All Fields] OR "health seek\*[All Fields]) AND ("older adults"[All Fields] OR "older people"[All Fields] OR "elderly"[All Fields] OR "seniors"[All Fields] OR "geriatrics"[All Fields])

2. Search: ("help seek\*" OR "treatment seek\*" OR "health information seek\*" OR "healthcare seek\*" OR "care seek\*" OR "health seek\*") AND ("older adults" OR "older people" OR "elderly" OR "seniors" OR "geriatrics") AND ("immigrants" OR "ethnic minority" OR "minority populations")

("help seek\*[All Fields] OR "treatment seek\*[All Fields] OR "health information seek\*[All Fields] OR "healthcare seek\*[All Fields] OR "care seek\*[All Fields] OR "health seek\*[All Fields]) AND ("older adults"[All Fields] OR "older people"[All Fields] OR "elderly"[All Fields] OR "seniors"[All Fields] OR "geriatrics"[All Fields]) AND ("immigrants"[All Fields] OR "ethnic minority"[All Fields] OR "minority populations"[All Fields])

### *Web of Science*

1. Search: ("help seek\*" OR "treatment seek\*" OR "health information seek\*" OR "healthcare seek\*" OR "care seek\*" OR "health seek\*") AND ("older adults" OR "older people" OR "elderly" OR "seniors" OR "geriatrics"); 2005-2021

ALL FIELDS: (("help seek\*" OR "treatment seek\*" OR "health information seek\*" OR "healthcare seek\*" OR "care seek\*" OR "health seek\*") AND ("older adults" OR "older people" OR "elderly" OR "seniors" OR "geriatrics"))

2. Search: ("help seek\*" OR "treatment seek\*" OR "health information seek\*" OR "healthcare seek\*" OR "care seek\*" OR "health seek\*") AND ("older adults" OR "older people" OR "elderly" OR "seniors" OR "geriatrics") AND ("immigrants" OR "ethnic minority" OR "minority populations"); 2005-2021

ALL FIELDS: (("help seek\*" OR "treatment seek\*" OR "health information seek\*" OR "healthcare seek\*" OR "care seek\*" OR "health seek\*") AND ("older adults" OR "older people" OR "elderly" OR "seniors" OR "geriatrics") AND ("immigrants" OR "ethnic minority" OR "minority populations"))

## *PsycInfo*

1. Search: ("help seek\*" OR "treatment seek\*" OR "health information seek\*" OR "healthcare seek\*" OR "care seek\*" OR "health seek\*") AND ("older adults" OR "older people" OR "elderly" OR "seniors" OR "geriatrics"); 2005-2021

( ("help seek\*" OR "treatment seek\*" OR "health information seek\*" OR "healthcare seek\*" OR "care seek\*" OR "health seek\*") ) AND ( ("older adults" OR "older people" OR "elderly" OR "seniors" OR "geriatrics") )

2. Search: ("help seek\*" OR "treatment seek\*" OR "health information seek\*" OR "healthcare seek\*" OR "care seek\*" OR "health seek\*") AND ("older adults" OR "older people" OR "elderly" OR "seniors" OR "geriatrics") AND ("immigrants" OR "ethnic minority" OR "minority populations"); 2005-2021

( ("help seek\*" OR "treatment seek\*" OR "health information seek\*" OR "healthcare seek\*" OR "care seek\*" OR "health seek\*") ) AND ( ("older adults" OR "older people" OR "elderly" OR "seniors" OR "geriatrics") ) AND ( ("immigrants" OR "ethnic minority" OR "minority populations") )

## *CINAHL*

1. Search: ("help seek\*" OR "treatment seek\*" OR "health information seek\*" OR "healthcare seek\*" OR "care seek\*" OR "health seek\*") AND ("older adults" OR "older people" OR "elderly" OR "seniors" OR "geriatrics"); 2005-2021

( ("help seek\*" OR "treatment seek\*" OR "health information seek\*" OR "healthcare seek\*" OR "care seek\*" OR "health seek\*") ) AND ( ("older adults" OR "older people" OR "elderly" OR "seniors" OR "geriatrics") )

2. Search: ("help seek\*" OR "treatment seek\*" OR "health information seek\*" OR "healthcare seek\*" OR "care seek\*" OR "health seek\*") AND ("older adults" OR "older people" OR "elderly" OR "seniors" OR "geriatrics") AND ("immigrants" OR "ethnic minority" OR "minority populations"); 2005-2021

( ("help seek\*" OR "treatment seek\*" OR "health information seek\*" OR "healthcare seek\*" OR "care seek\*" OR "health seek\*") ) AND ( ("older adults" OR "older people" OR "elderly" OR "seniors" OR "geriatrics") ) AND ( ("immigrants" OR "ethnic minority" OR "minority populations") )

## *Scopus*

1. Search: ("help seek\*" OR "treatment seek\*" OR "health information seek\*" OR "healthcare seek\*" OR "care seek\*" OR "health seek\*") AND ("older adults" OR "older people" OR "elderly" OR "seniors" OR "geriatrics")

TITLE-ABS-KEY ( "help seek\*" OR "treatment seek\*" OR "health information seek\*" OR "healthcare seek\*" OR "care seek\*" OR "health seek\*" ) AND TITLE-ABS-KEY ( "older adults" OR "older people" OR "elderly" OR "seniors" OR "geriatrics" )

2. Search: ("help seek\*" OR "treatment seek\*" OR "health information seek\*" OR "healthcare seek\*" OR "care seek\*" OR "health seek\*") AND ("older adults" OR "older people" OR "elderly" OR "seniors" OR "geriatrics") AND ("immigrants" OR "ethnic minority" OR "minority populations")

TITLE-ABS-KEY ( "help seek\*" OR "treatment seek\*" OR "health information seek\*" OR "healthcare seek\*" OR "care seek\*" OR "health seek\*" ) AND TITLE-ABS-KEY ( "older adults" OR "older people" OR "elderly" OR "seniors" OR "geriatrics" ) AND TITLE-ABS-KEY ( "immigrants" OR "ethnic minority" OR "minority populations" )
